# Supplementary material for: Identification and characterization of a major QTL underlying soybean isoflavone malonylglycitin content
Source: PubMed Central journal article supplement — Breed Sci. 2019 Sep 5;69(4):564–72. doi: 10.1270/jsbbs.19027 (PMC6977442; doi:10.1270/jsbbs.19027), 2019-09-05
Supplement: 69_19027_1.pdf [file 69_19027_1.pdf]

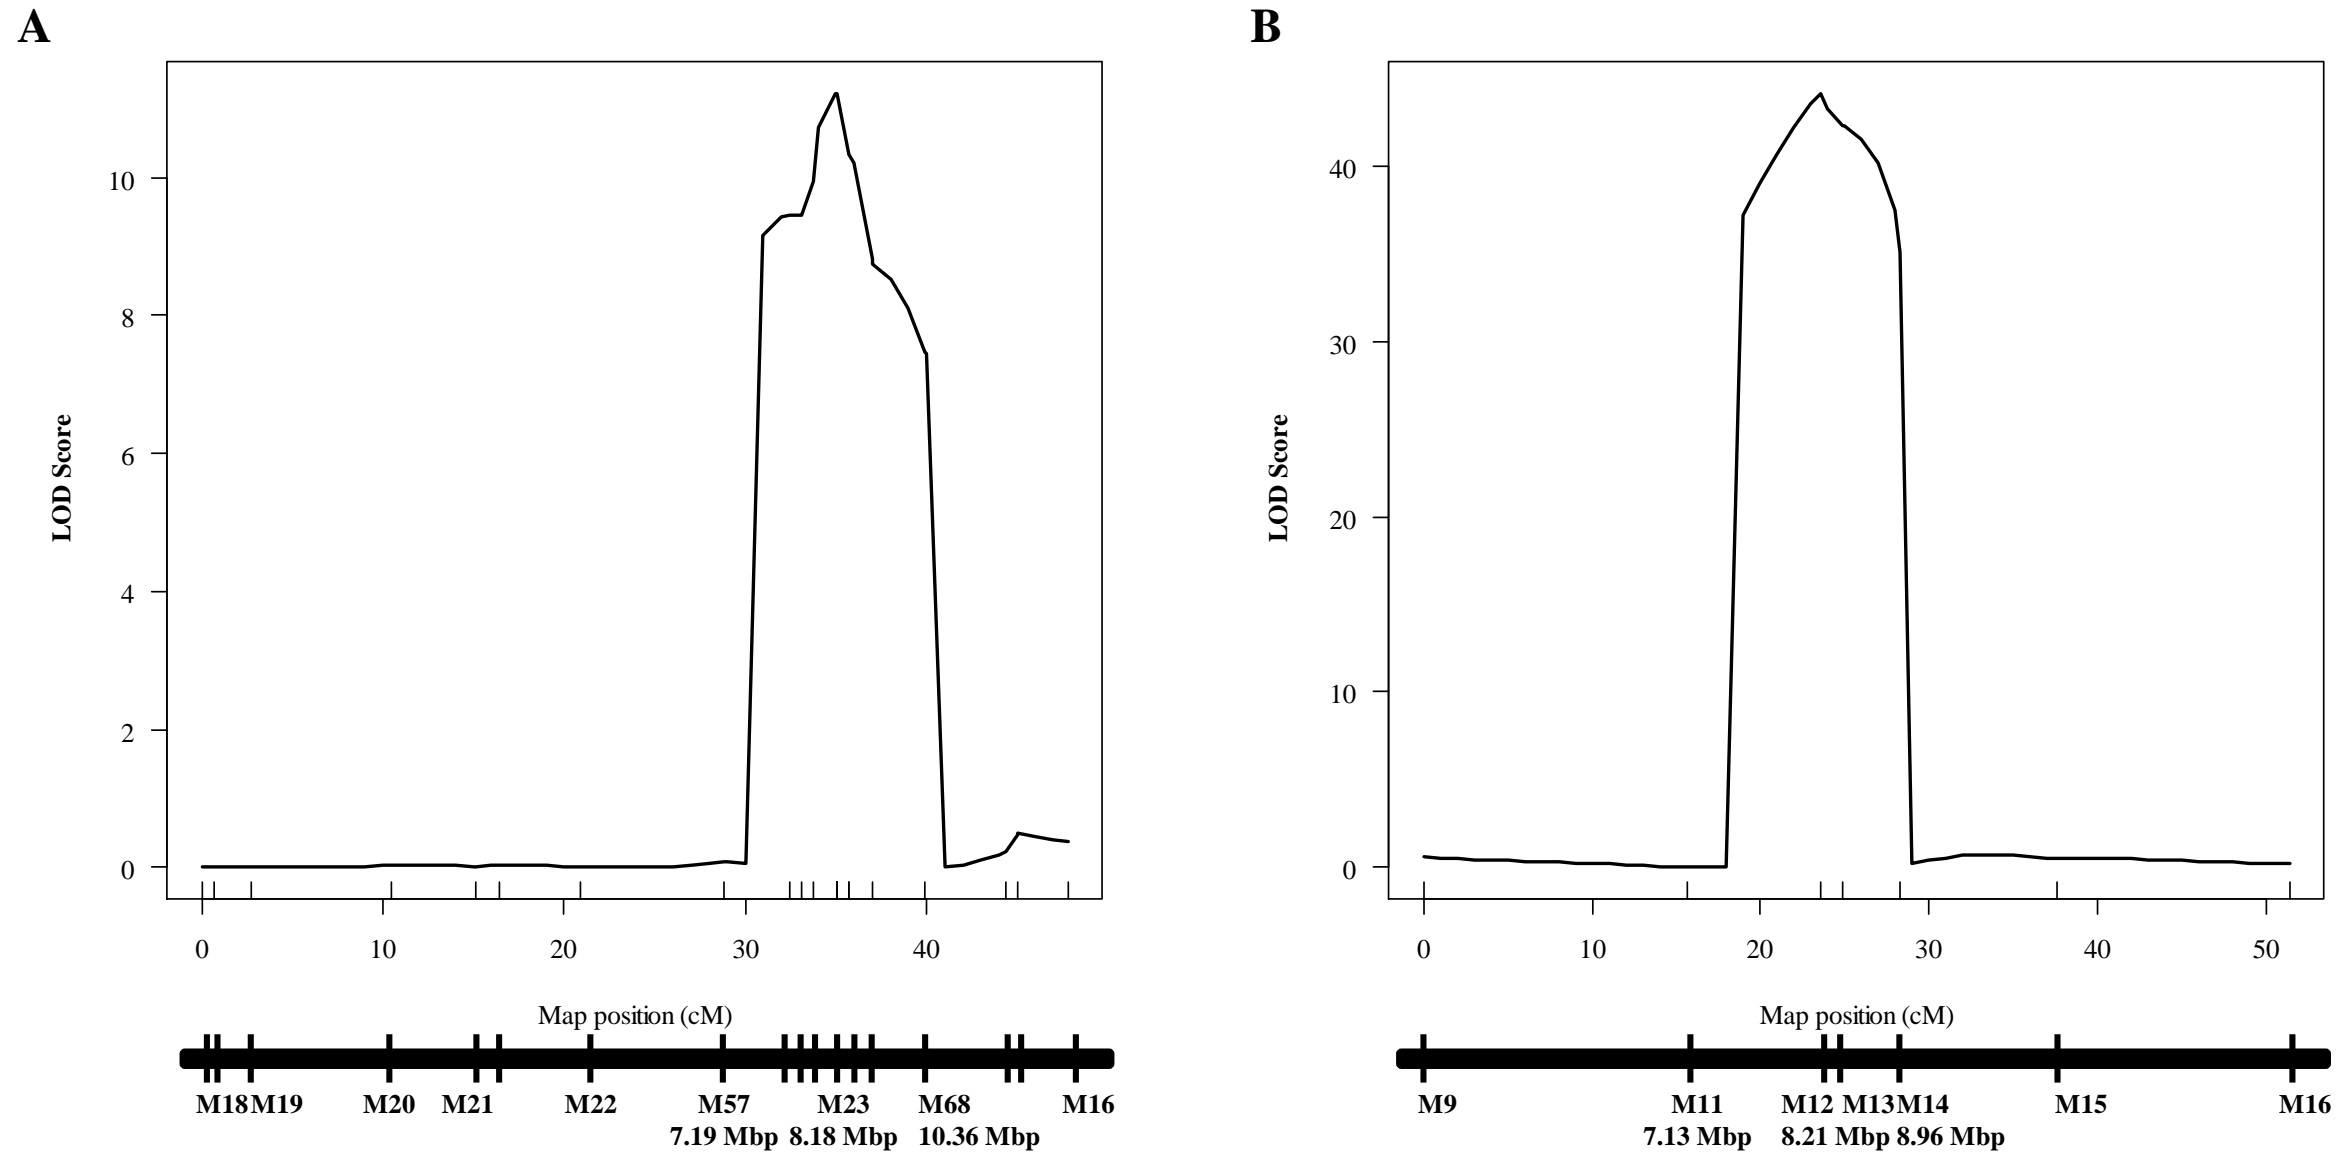

Supplemental Fig. 1. LOD profile obtained from composite interval mapping of M\_Gly with AF-F<sub>4</sub> (A) and KF-F<sub>2</sub> (B) population on Gm11. Representative marker names and physical positions of these shown in supplemental table1 are displayed below of each graph.
